# Supplementary material
Source: PubMed Central journal article supplement (PMC3536218)
Supplement: JCM.02500-12_zjm999092216so1.pdf [file JCM.02500-12_zjm999092216so1.pdf]

**Table S1.** Clinical isolates and reference strains belonging to *Burkholderia cepacia* complex used in this study

| Species<br>( <i>recA</i> gene<br>sequence) | No. of<br>isolates | Strain / Origin /<br>Culture collection<br>number <sup>r,s</sup> | Isolation<br>date | <i>recA</i><br>HaeIII<br>RFLP<br>type <sup>w</sup> | <i>recA</i><br>allele <sup>x</sup> | Best match<br>GenBank<br>accession<br>number | BOX -<br>PCR |
|--------------------------------------------|--------------------|------------------------------------------------------------------|-------------------|----------------------------------------------------|------------------------------------|----------------------------------------------|--------------|
| <i>B. cepacia</i>                          | 6                  | ATCC 25416,                                                      |                   | D                                                  |                                    |                                              | -            |
|                                            |                    | DSMZ 9241,                                                       |                   |                                                    |                                    |                                              | -            |
|                                            |                    | DSMZ 50182                                                       |                   |                                                    |                                    |                                              | -            |
| <i>B. multivorans</i>                      | 5                  | Clinical isolates                                                |                   | E                                                  |                                    | D90120                                       | -            |
|                                            |                    | ATCC 17616,<br>LMG13011                                          |                   | F                                                  |                                    |                                              | -            |
| <i>B. cenocepacia</i>                      | 10                 | Clinical isolates                                                |                   | F                                                  |                                    | EF427834                                     | -            |
|                                            |                    | LMG 16656,<br>LMG 18864                                          |                   | G                                                  |                                    |                                              | -            |
|                                            |                    | LMG 16654                                                        |                   | J'                                                 |                                    |                                              | -            |
| <i>B. stabilis</i>                         | 3                  | Clinical isolates                                                |                   | G                                                  |                                    | AM747720                                     | -            |
|                                            |                    | LMG 14294,<br>LMG 18871                                          |                   | J'                                                 |                                    | GU951940                                     | -            |
| <i>B. vietnamiensis</i>                    | 3                  | Clinical isolates                                                |                   | J                                                  |                                    | GU938640                                     | -            |
|                                            |                    | LMG 10929                                                        |                   | A                                                  |                                    |                                              | -            |
| <i>B. ambifaria</i>                        | 3                  | Clinical isolates                                                |                   | A                                                  |                                    | AY951907                                     | -            |
|                                            |                    | LMG 19182,<br>LMG 19468                                          |                   | N                                                  |                                    |                                              | -            |
| <i>B. seminalis</i>                        | 1                  | HNLP 804                                                         |                   | N                                                  |                                    | AY951912                                     | -            |
| <i>B. contaminans</i>                      | 79                 | Clinical isolates <sup>t</sup>                                   |                   | H                                                  |                                    | AF748102                                     | -            |
|                                            |                    | HNLP 26364                                                       | Sep-2008          | K                                                  | 64                                 | GU938636                                     | -            |
|                                            |                    | HNLP 1004                                                        | Apr-2009          | K                                                  | 64                                 | GU938636                                     | -            |
|                                            |                    | HST 35 <sup>iv</sup>                                             | Nov-2004          | K                                                  | 71                                 | GU938664                                     | B7           |
|                                            |                    | HST 36 <sup>iv</sup>                                             | Nov-2004          | K                                                  | 71                                 | GU938664                                     | B7           |
|                                            |                    | HST 77 <sup>j</sup>                                              | Jun-2005          | K                                                  | 71                                 | GU938664                                     | B7           |
|                                            |                    | HNLP 69 <sup>dv</sup>                                            | Apr-2004          | K                                                  | 71                                 | GU938664                                     | B8           |
|                                            |                    | HNLP 7960 <sup>d</sup>                                           | Oct-2008          | K                                                  | 71                                 | GU938664                                     | B1           |
|                                            |                    | HNLP 8294 <sup>d</sup>                                           | May-2009          | K                                                  | 71                                 | GU938664                                     | B8           |
|                                            |                    | HNLP 102 <sup>v</sup>                                            | May-2004          | K                                                  | 71                                 | GU938664                                     | B7           |
|                                            |                    | HNLP 8899                                                        | Jul-2010          | K                                                  | 71                                 | GU938664                                     | B1           |
|                                            |                    | HNLP 8508 <sup>e</sup>                                           | Oct-2009          | K                                                  | 71                                 | GU938664                                     | B8           |
|                                            |                    | HNLP 8769 <sup>e</sup>                                           | May-2010          | K                                                  | 71                                 | GU938664                                     | B1           |
|                                            |                    | HNLP 9015 <sup>e</sup>                                           | Oct-2010          | K                                                  | 71                                 | GU938664                                     | B1           |
|                                            |                    | HST 9 <sup>av</sup>                                              | Jan-2004          | K                                                  | 71                                 | GU938664                                     | B9           |
|                                            |                    | HST 10 <sup>av</sup>                                             | Jan-2004          | K                                                  | 71                                 | GU938664                                     | B9           |
|                                            |                    | HST 11 <sup>av</sup>                                             | Feb-2004          | K                                                  | 71                                 | GU938664                                     | B9           |
| HST 12 <sup>av</sup>                       | Mar-2004           | K                                                                | 71                | GU938664                                           | B9                                 |                                              |              |
| HST 13 <sup>avu</sup>                      | Jun-2004           | K                                                                | 71                | GU938664                                           | B8                                 |                                              |              |
| HST 14 <sup>avu</sup>                      | Jul-2004           | K                                                                | 71                | GU938664                                           | B8                                 |                                              |              |
| HST 15 <sup>av</sup>                       | Sep-2004           | K                                                                | 71                | GU938664                                           | B8                                 |                                              |              |

|                          |          |    |    |          |     |
|--------------------------|----------|----|----|----------|-----|
| HST 16 <sup>av</sup>     | Sep-2004 | K  | 71 | GU938664 | B8  |
| HST 17 <sup>av</sup>     | Oct-2004 | K  | 71 | GU938664 | B8  |
| HST 18 <sup>av</sup>     | Nov-2004 | K  | 71 | GU938664 | B8  |
| HST 31 <sup>iv</sup>     | Oct-2004 | K  | 71 | GU938664 | B8  |
| HST 32 <sup>iv</sup>     | Nov-2004 | K  | 71 | GU938664 | B8  |
| HST 99 <sup>i</sup>      | Jan-2006 | K  | 71 | GU938664 | B8  |
| HNLP 7864 <sup>m</sup>   | Sep-2008 | K  | 71 | GU938664 | B1  |
| HNLP 8781 <sup>m</sup>   | May-2010 | K  | 71 | GU938664 | B1  |
| HNLP 9086 <sup>m</sup>   | Nov-2010 | K  | 71 | GU938664 | B1  |
| HNLP 87 <sup>v</sup>     | May-2004 | K  | 71 | GU938664 | B8  |
| HNLP 23 <sup>lv</sup>    | Apr-2004 | K  | 71 | GU938664 | B8  |
| HNLP 79 <sup>lv</sup>    | Apr-2004 | K  | 71 | GU938664 | B8  |
| HNLP 6406 <sup>lv</sup>  | Oct-2005 | K  | 71 | GU938664 | B1  |
| HST 44 <sup>v</sup>      | Oct-2004 | K  | 71 | GU938664 | B8  |
| HNLP 6507                | Nov-2005 | AT | 71 | GU938664 | B2  |
| HST 91                   | Sep-2005 | K  | 71 | GU938624 | B8  |
| HNLP 67 <sup>kv</sup>    | Feb-2004 | K  | 71 | GU938664 | B10 |
| HNLP 7859 <sup>k</sup>   | Sep-2008 | K  | 71 | GU938664 | B1  |
| HNLP 8786 <sup>k</sup>   | May-2010 | K  | 71 | GU938664 | B1  |
| HNLP 8451                | Oct-2009 | K  | 71 | GU938664 | B5  |
| HNLP 8952                | Sep-2010 | K  | 71 | GU938664 | B1  |
| HST 81                   | Aug-2005 | K  | 71 | GU938664 | B8  |
| HNLP 57 <sup>bv</sup>    | Apr-2004 | K  | 71 | GU938664 | B8  |
| HNLP 71 <sup>bv</sup>    | May-2004 | K  | 71 | GU938664 | B8  |
| HNLP 229 <sup>b</sup>    | May-2006 | K  | 71 | EF602577 | B8  |
| HST 64                   | Jan-2005 | K  | 71 | GU938664 | B8  |
| HST 102                  | Apr-2006 | K  | 71 | GU938664 | B8  |
| HNLP 75 <sup>gv</sup>    | Apr-2004 | K  | 71 | GU938664 | B7  |
| HNLP 6928 <sup>g</sup>   | Dec-2006 | K  | 71 | GU938664 | B8  |
| HNLP 6929 <sup>g</sup>   | Dec-2006 | K  | 71 | GU938664 | B8  |
| HNLP 74 <sup>v</sup>     | May-2004 | K  | 71 | GU938664 | B6  |
| HST R1 <sup>v</sup>      | Jan-2004 | K  | 71 | GU938664 | B4  |
| HST 28 <sup>v</sup>      | Jun-2004 | K  | 71 | GU938664 | B8  |
| HST 46 <sup>v</sup>      | Aug-2004 | K  | 71 | GU938664 | B3  |
| HNLP 92 <sup>fv</sup>    | May-2004 | K  | 71 | GU938664 | B6  |
| HNLP 7905 <sup>f</sup>   | Oct-2008 | K  | 71 | GU938664 | B1  |
| HNLP 8822 <sup>f</sup>   | Jun-2010 | K  | 71 | GU938664 | B1  |
| HNLP 9034                | Oct-2010 | K  | 71 | GU938664 | B1  |
| HNLP 70 <sup>cv</sup>    | May-2004 | K  | 71 | GU938664 | B8  |
| HNLP 7832 <sup>c</sup>   | Sep-2008 | K  | 71 | GU938664 | B8  |
| HNLP 7967 <sup>c</sup>   | Oct-2008 | K  | 71 | GU938664 | B8  |
| HNLP 8232 <sup>c</sup>   | Apr-2009 | K  | 71 | GU938664 | B8  |
| HNLP 8356 <sup>c</sup>   | Jul-2009 | K  | 71 | GU938664 | B8  |
| HNLP 8939-1 <sup>c</sup> | Sep-2010 | K  | 71 | GU938664 | B8  |
| HNLP 8939-2 <sup>c</sup> | Sep-2010 | K  | 71 | GU938664 | B8  |
| HNLP 9102 <sup>c</sup>   | Dec-2010 | K  | 71 | GU938664 | B1  |
| HNLP R165 <sup>c</sup>   | Dec-2010 | K  | 71 | GU938664 | B1  |
| HNLP 77 <sup>v</sup>     | May-2004 | K  | 71 | GU938664 | B8  |
| HNLP 1002                | Apr-2009 | K  | 71 | GU938664 | B8  |
| HNLP 703 <sup>u</sup>    | Dec-2007 | K  | 71 | GU951938 | B8  |

|                        |          |    |     |          |    |
|------------------------|----------|----|-----|----------|----|
| HNLP 97 <sup>hv</sup>  | Jun-2004 | K  | 71  | GU938664 | B6 |
| HNLP 98 <sup>hv</sup>  | Jun-2004 | K  | 71  | GU938664 | B6 |
| HNLP 6407 <sup>h</sup> | Oct-2005 | K  | 71  | GU938664 | B6 |
| HST 1 <sup>v</sup>     | Dec-2004 | K  | 71  | GU938664 | B7 |
| HNLP 64 <sup>v</sup>   | Apr-2004 | K  | 71  | GU938664 | B8 |
| HNLP 50 <sup>v</sup>   | Apr-2004 | K  | 71  | GU938664 | B8 |
| HNLP 99 <sup>v</sup>   | Jun-2004 | K  | 71  | GU938664 | B7 |
| HNLP 1001 <sup>u</sup> | Apr-2009 | J  | 166 | GU951969 | -  |
| HNLP 7740              | Jun-2008 | AT | 243 | GU144403 | -  |

<sup>a</sup> – <sup>m</sup> Isolates with the same letter belonged to the same patient. HST, HNRN, and HNLP correspond to bacterial isolates provided by Hospital de Niños de la Santísima Trinidad de Córdoba, Córdoba Province, Hospital Pedro Moguillanski, Cipoletti, Río Negro Province, and Hospital de Niños de La Plata Sor María Ludovica, La Plata, Buenos Aires Province, respectively. <sup>t</sup> Isolates recovered from 2 CF patients from Hospital de Niños de la Santísima Trinidad de Córdoba, Córdoba Province, Argentina. <sup>u</sup> Identification confirmed by *gyrB* gene sequence analysis. <sup>v</sup> Isolates recovered during the outbreak (2004 – 2005). <sup>w</sup> RFLP: Restriction Fragment Length Polymorphism, *HaeIII-recA*-RFLP. <sup>x</sup> Allele identity was obtained by comparing the sequence of a 398 bp *recA* fragment against the Multi Locus Sequence Typing (MLST) database (<http://pubmlst.org/bcc/>)
